# Supplementary material for: Karenia brevis Extract Induces Cellular Entry through Distinct Mechanisms in Phagocytic RAW 264.7 Macrophages versus Non-Phagocytic Vero Cells
Source: MDPI journal article supplement (doi:10.3390/md22010004), 2023-12-19
Supplement: s1 [file s1]

## Supplementary Materials

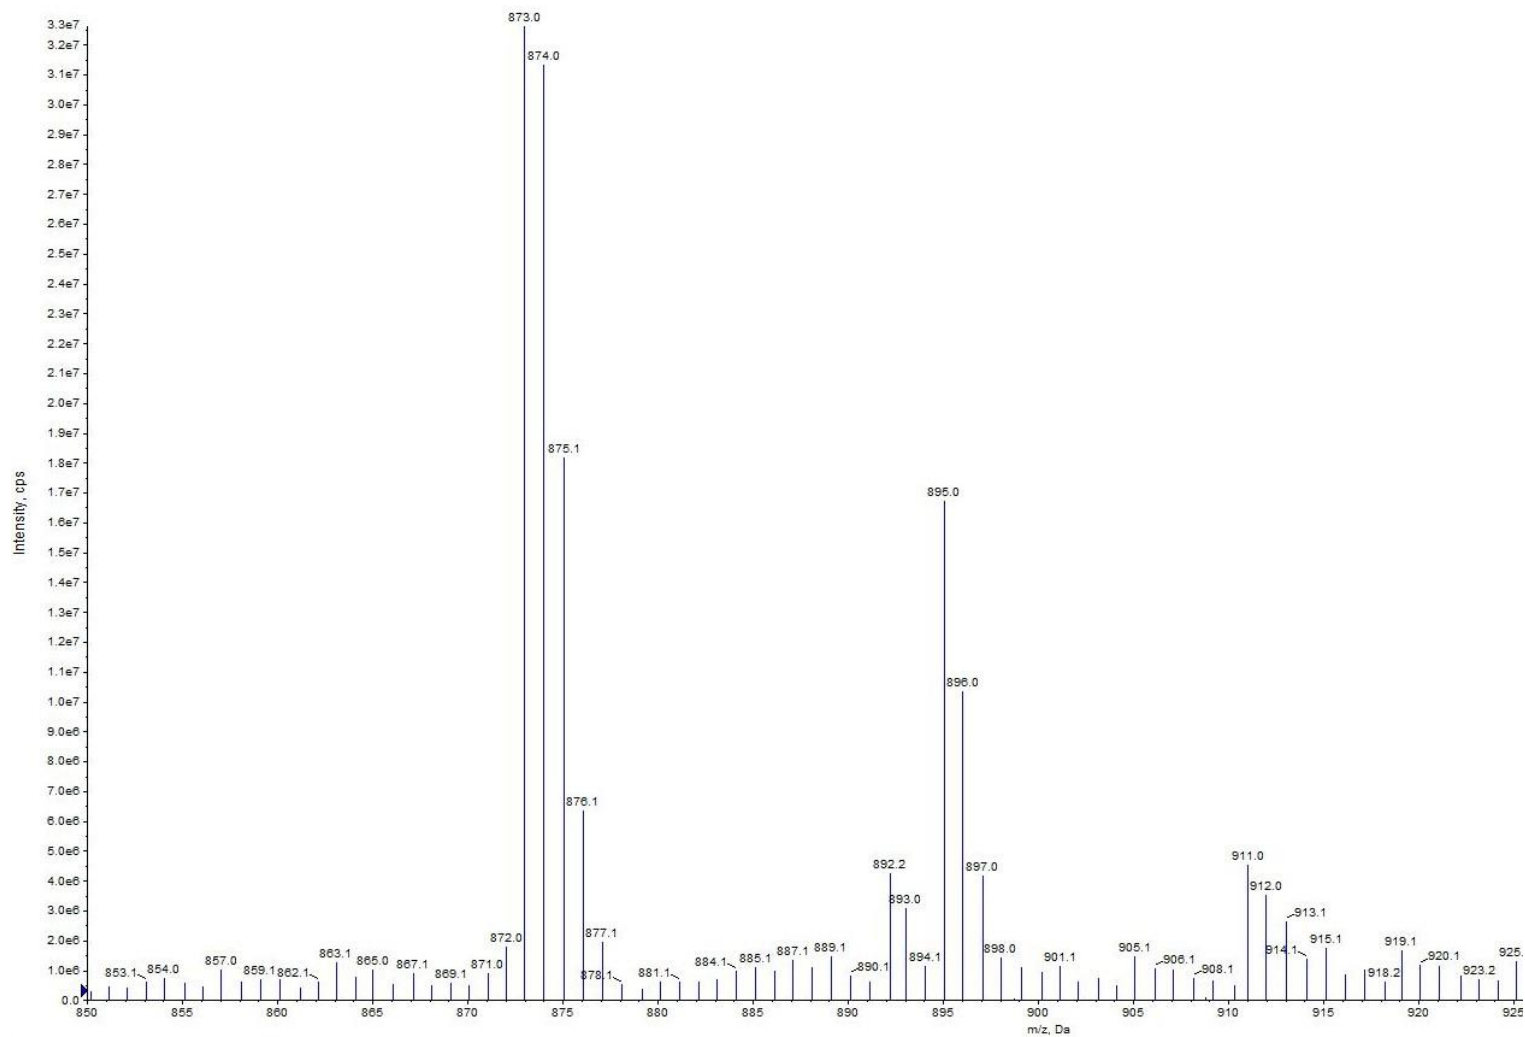

**Figure S1.** Mass spectrum of isolated compound from *K. brevis* algae extract analyzed in positive mode from 850 – 925 Da indicates the presence of pheophytin  $\alpha$ .

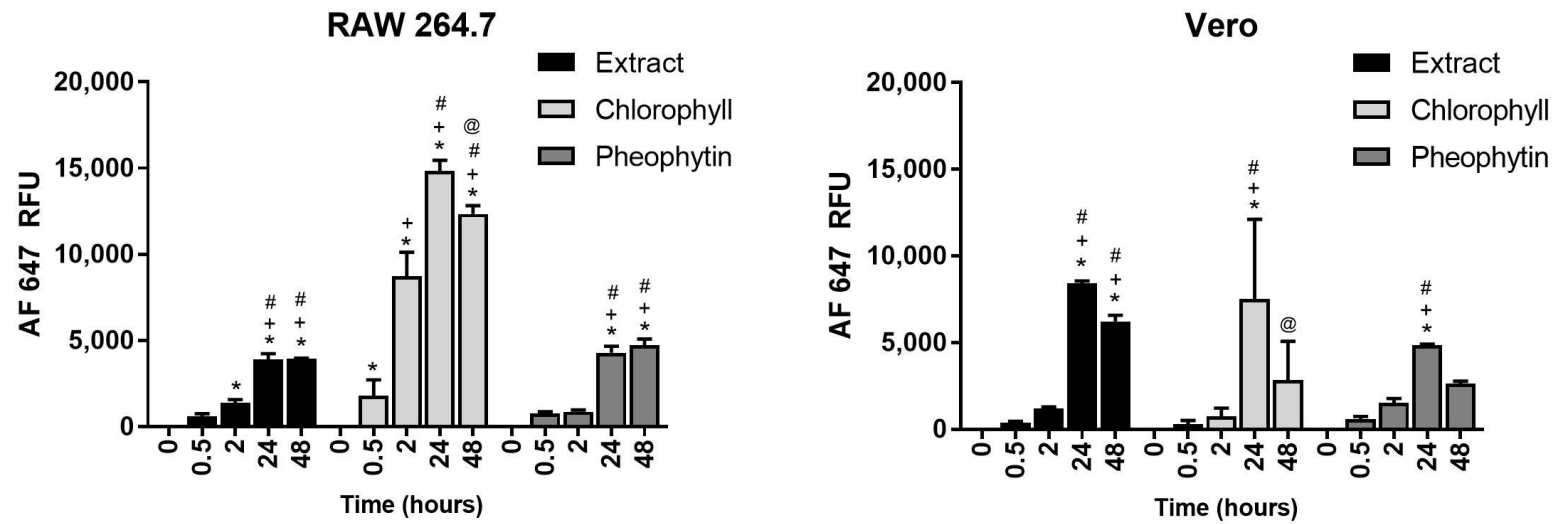

**Figure S2.** Fluorescence accumulation in RAW 264.7 cells and Vero cells over a 30 minute to 48 hour time course as analyzed by the red laser line Alexa Fluor 647 filter. Symbols indicate a statistically significant difference from no treatment (\*), 0.5 hours (+), 2 hours (#), and 24 hours (@) with  $p < 0.05$ .

**Table S1.** Relative fluorescence change over untreated control cells with all flow cytometry filters. *K. Brevis* extract at 500 ng/mL on RAW 264.7 cells for 24 hours. Half of the channels were affected significantly by autofluorescence as determined by two-way ANOVA, \* indicates a statistically significant difference from vehicle control (VC) with  $p < 0.05$ , (n=3).

| Filter   | Excitation Laser (nm) | Emission max (nm) | % $\Delta$ over control |
|----------|-----------------------|-------------------|-------------------------|
| BV421    | Violet 405            | 421               | -17%                    |
| BV510    |                       | 510               | -14%                    |
| BV605    |                       | 602               | -12%                    |
| BV650*   |                       | 650               | 7,641%                  |
| BV786*   |                       | 786               | 2,160%                  |
| BB515    | Blue 488              | 515               | -12%                    |
| PE       |                       | 578               | -17%                    |
| PE-CF594 |                       | 612               | -16%                    |
| PerCP*   |                       | 678               | 1,260%                  |
| AF647*   | Red 640               | 665               | 3,038%                  |
| APC*     |                       | 660               | 1,094%                  |
| APC-C7*  |                       | 785               | 589%                    |
